# Supplementary material for: An assay to image neuronal microtubule dynamics in mice
Source: PubMed Central journal article supplement — Nat Commun. 2014 Sep 12;5:4827. doi: 10.1038/ncomms5827 (PMC4175586; doi:10.1038/ncomms5827), 2014-09-12
Supplement: ncomms5827-s1.pdf [file ncomms5827-s1.pdf]

## SUPPLEMENTARY INFORMATION

### **An assay to image neuronal microtubule dynamics in mice**

Tatjana Kleele<sup>1</sup>, Petar Marinković<sup>2,3</sup>, Philip R. Williams<sup>1</sup>, Sina Stern<sup>4</sup>, Emily E. Weigand<sup>5</sup>, Peter Engerer<sup>1</sup>, Ronald Naumann<sup>6</sup>, Jana Hartmann<sup>7</sup>, Rosa M. Karl<sup>7</sup>, Frank Bradke<sup>4</sup>, Derron Bishop<sup>5</sup>, Jochen Herms<sup>2,3,8</sup>, Arthur Konnerth<sup>7,8,9</sup>, Martin Kerschensteiner<sup>8,10</sup>, Leanne Godinho<sup>1</sup> and Thomas Misgeld<sup>1,3,8,9</sup>

<sup>1</sup> Institute of Neuronal Cell Biology, Technische Universität München, Munich, Germany

<sup>2</sup> Center for Neuropathology and Prion Research, Ludwig-Maximilians-Universität München, Munich, Germany

<sup>3</sup> German Center for Neurodegenerative Diseases (DZNE), Munich, Germany

<sup>4</sup> Axon Growth and Regeneration, German Center for Neurodegenerative Diseases (DZNE), Bonn, Germany

<sup>5</sup> Department of Physiology, Indiana University School of Medicine–Muncie, Muncie, Indiana, USA

<sup>6</sup> Transgenic Core Facility, Max-Planck-Institute of Molecular Cell Biology and Genetics, Dresden, Germany

<sup>7</sup> Institute of Neuroscience, Technische Universität München, Munich, Germany

<sup>8</sup> Munich Cluster for Systems Neurology (SyNergy), Munich, Germany

<sup>9</sup> Center of Integrated Protein Science (CIPS<sup>M</sup>), Munich, Germany

<sup>10</sup> Institute of Clinical Neuroimmunology, Ludwig-Maximilians Universität München, Munich, Germany

## SUPPLEMENTARY FIGURES

### *Thy1:EB3-YFP* Line J045

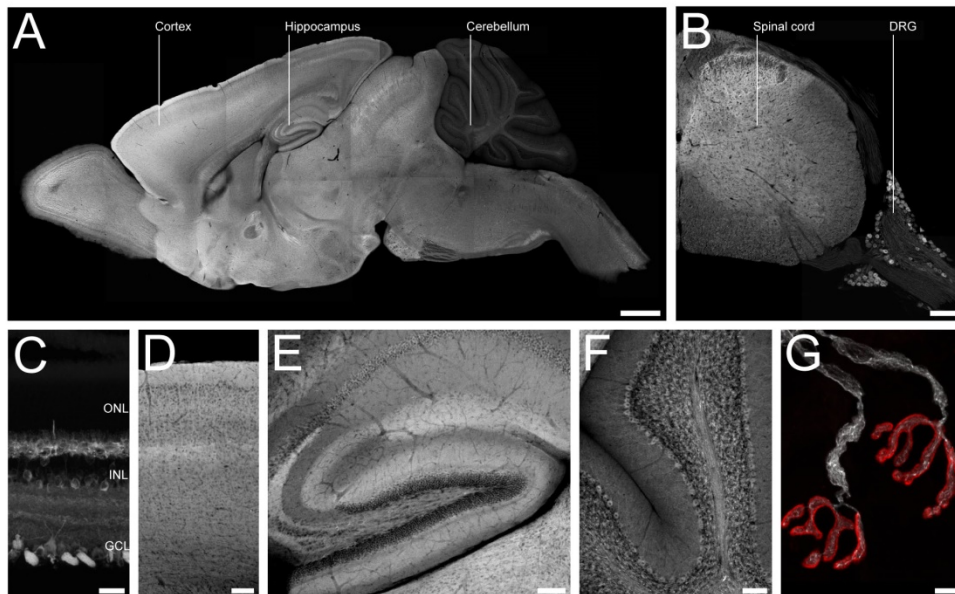

### *Thy1:EB3-YFP* Line J023

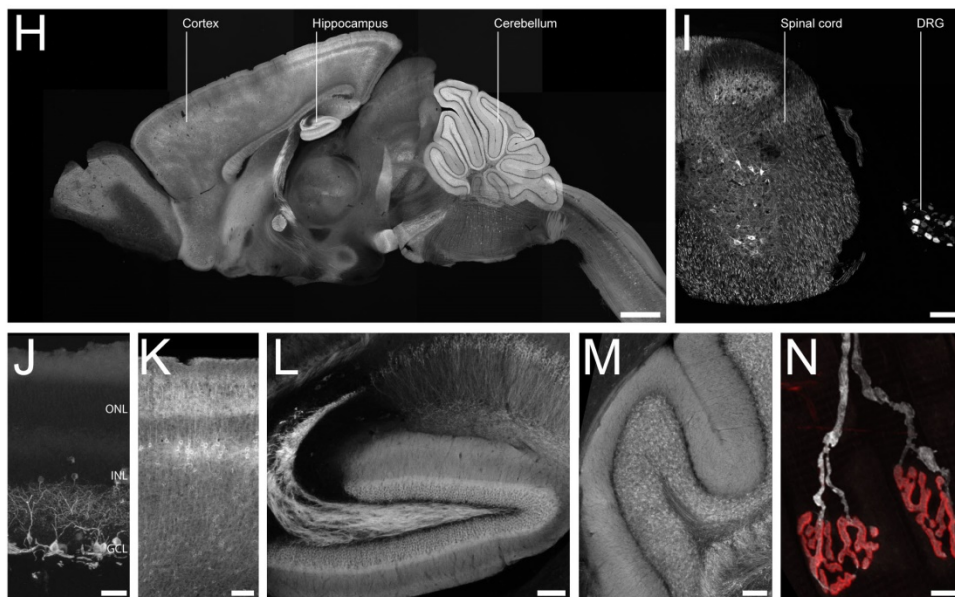

**Supplementary Figure 1 | Expression pattern in two different *Thy1:EB3-YFP* transgenic mouse lines.** The EB3-YFP transgene is expressed widely in both transgenic lines (A-G: EB3J045; H-N: EB3J023) in the CNS (A and H, sagittal section of the brain; B and I, horizontal section of the spinal cord; C and J, retina; D and K, cortex; E and L, hippocampus; F and M, cerebellum) and the PNS (G and N, neuromuscular junctions, postsynaptic receptors stained with bungarotoxin in red; but also note expression in dorsal root ganglia in B and I). Scale bar in A and H 1 mm; in B and I 200  $\mu$ m; in C and J 100  $\mu$ m; in D, E, F, K, L and M 50  $\mu$ m and in G and N 5  $\mu$ m.

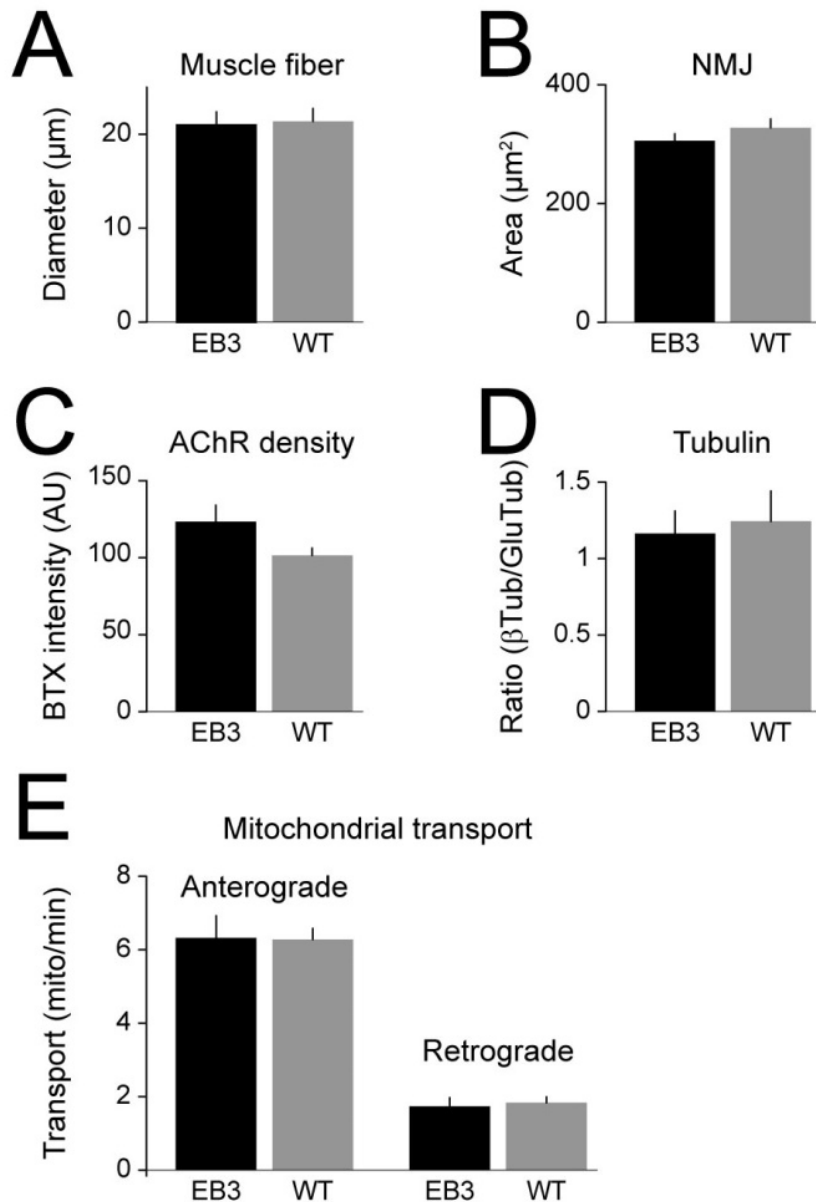

**Supplementary Figure 2 | No abnormalities were found in the neuromuscular system of *Thy1:EB3-YFP* mice.** (A-C) *Thy1:EB3-YFP* mice (line J045; "EB3") have normal muscle fiber diameters (A), as well as normal postsynaptic areas (B) and receptor densities (C) at neuromuscular junctions (compared to non-transgenic litter-mates, "WT"; n > 240 muscle fibers or n > 50 synapses from 3 animals per genotype). (D-E) The ratio of all neuronal tubulin ("βTub") to detyrosinated tubulin ("GluTub"; measured by double-immunostainings; D; n > 40 axons from 3 mice per genotype) and the axonal transport flux of mitochondria (measured in *MitoMice* crossed into *Thy1:EB3-YFP* mice, E) is the same between transgenic and non-transgenic litter-mates (n > 25 axons from 3 animals per genotype).

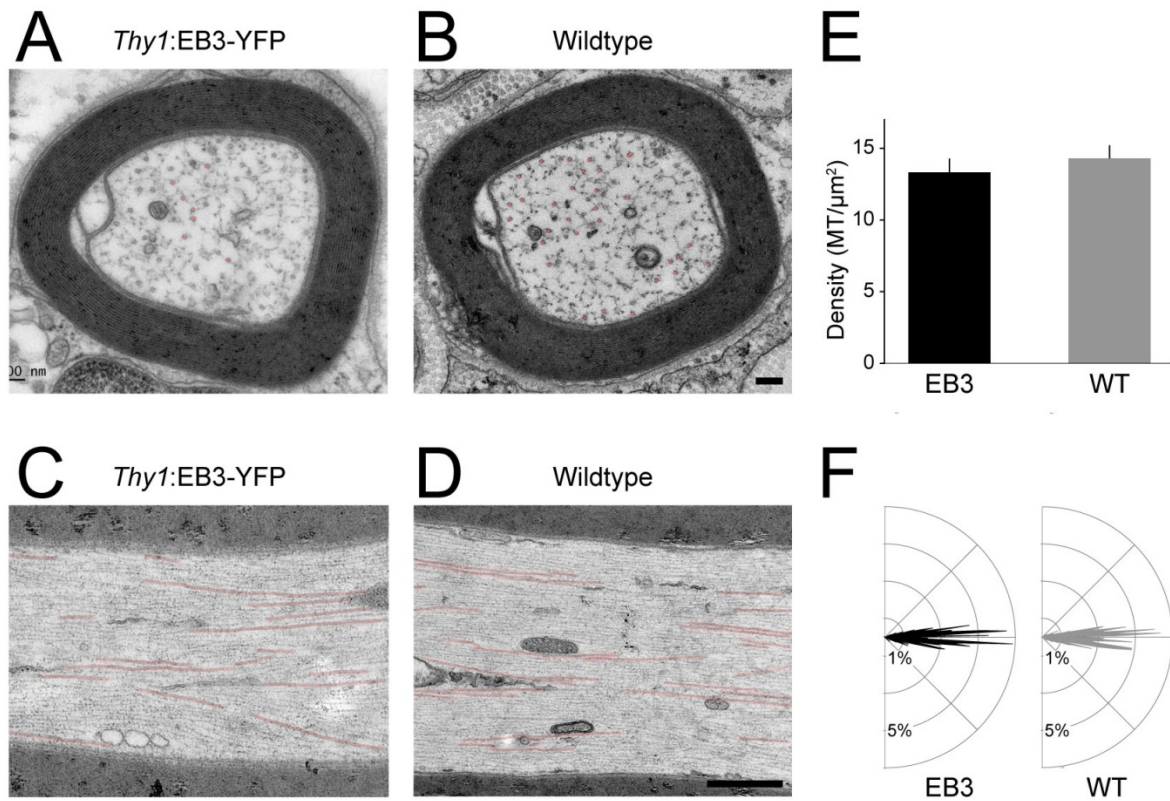

**Supplementary Figure 3 | PNS axons and microtubules are ultrastructurally normal in *Thy1:EB3-YFP* mice.** (A-D) Electron micrographs of perpendicular (A, B) and longitudinal (C, D) sections of axons in intramuscular fascicles of *Thy1:EB3-YFP* mice (line J045; A, C) and in non-transgenic litter-mates (B, D) are indistinguishable. (E, F) Quantification of microtubule (MT) density (E) and orientation in relation to axon axis (polar plots, F). Microtubules are pseudo-colored red;  $n \geq 3$  axons from 2 mice. Scale bar in B 0.1  $\mu\text{m}$  (also for A); in D 0.5  $\mu\text{m}$  (also for C).

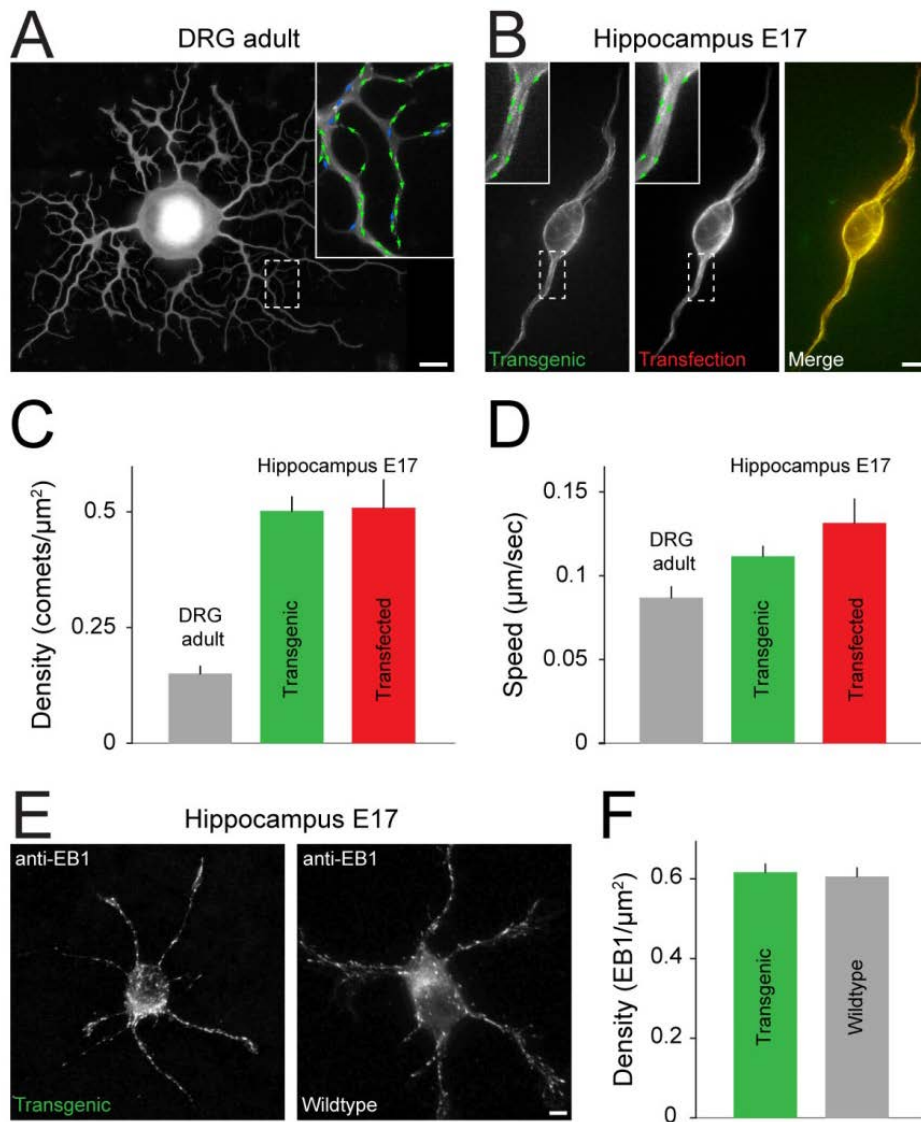

**Supplementary Figure 4 | Comparison of endogenous, transfection- and transgene-based comet labeling in cultured neurons.** (A) Adult DRG neuron from *Thy1:EB3-YFP* transgenic mice. Inset shows a higher magnification of DRG neurites with EB3 comets represented as in **Fig. 1**. (B) E17 hippocampal neurons show a 100% co-localization (insets) of the EB3-YFP transgene and transfected EB3-mCherry comets. (C, D) Quantification of density and speed from adult DRG and E17 hippocampal neurons cultured from *Thy1:EB3-YFP* mice and EB3-mCherry transfected wildtype hippocampal neurons. Transgenic and transfected hippocampal neurons do not differ significantly in density (C) or speed (D;  $n = 7$  neurites from  $\geq 3$  cells for each group). (E, F) Immunostainings of EB1 in *Thy1:EB3-YFP* transgenic and wildtype E17 hippocampal neurons show a similar pattern and density of speckled staining (E). Quantification of EB1 speckle density shows no significant difference between those two groups (F;  $n = 32$  neurites from  $\geq 9$  cells for each group). Scale bar in A 20 $\mu\text{m}$  and in B, E 5 $\mu\text{m}$ .

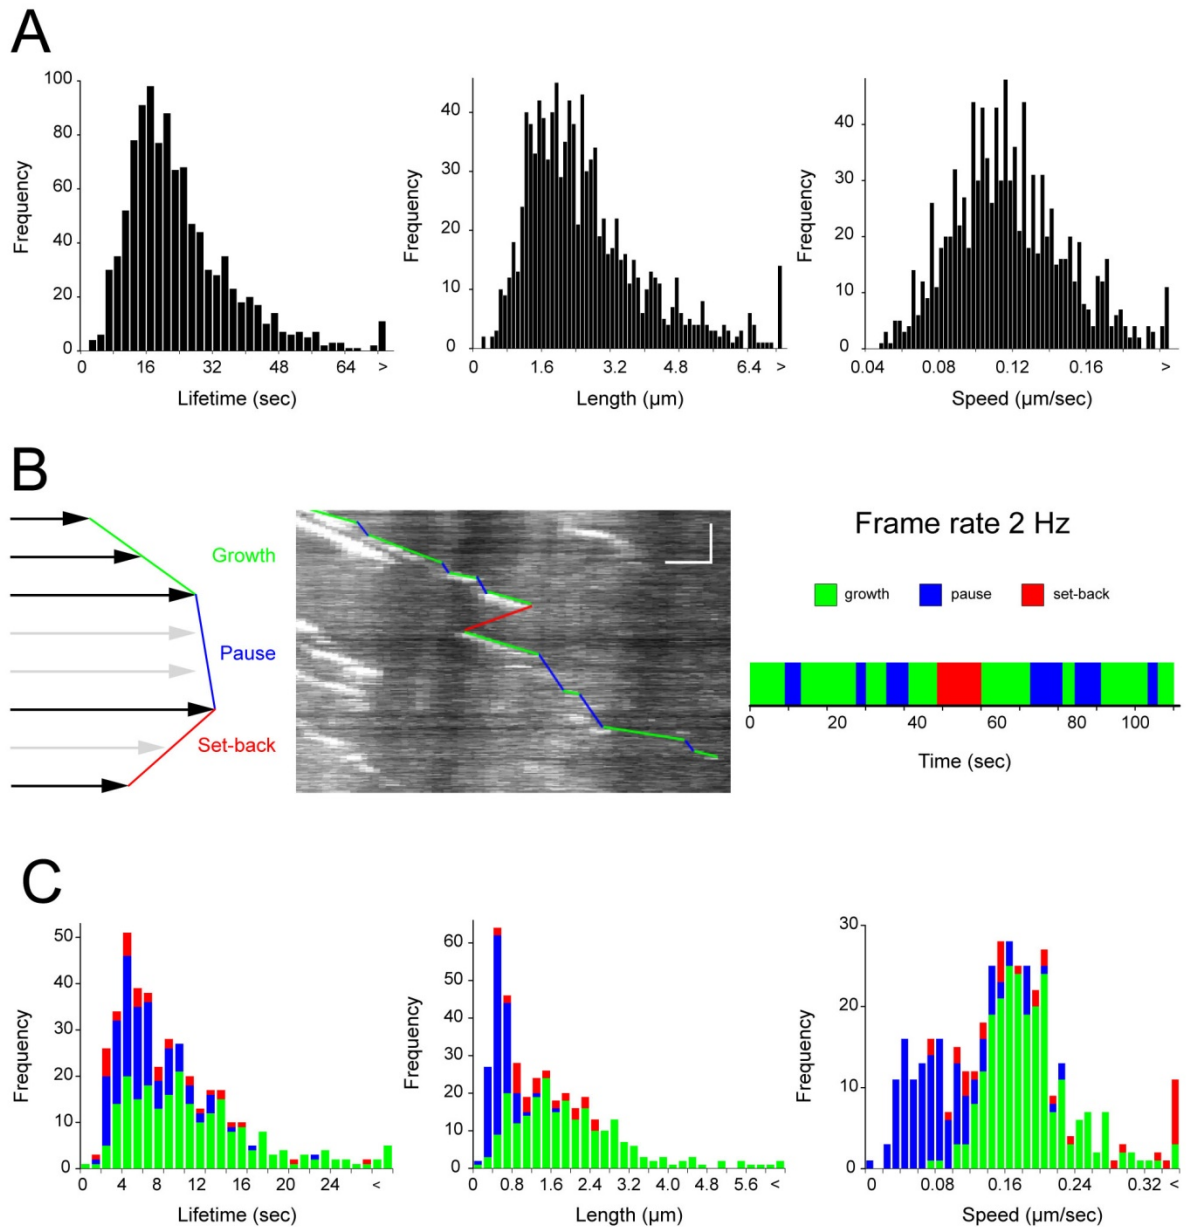

**Supplementary Figure 5 | Analysis of comet tracks.** (A) Histograms showing the distribution of lifetime, length and speed of the comets in distal motor axons in the triangularis sterni explant, which were also used to generate plots in **Fig. 1**. (B) Analysis of track characteristics derived from 2 Hz imaging of comets in intercostal axons of *Thy1:EB3-YFP* triangularis explants. Schematic of movement behaviors (**left**), kymograph of an axon segment with classified track segments indicated for one comet (**middle**), analysis as “event classification” along the time axis (**right**). (C) Frequency distribution of track segments color coded for respective behavior (n = 69 tracks from 2 animals). Scale bars in **B** 2  $\mu\text{m}$ , horizontal bar; 10 sec, vertical bar.

## SUPPLEMENTARY TABLE

| Line | Spinal cord |     | Retina |        |        | Cortex   | Cerebellum |        |        | Hippocampus |     |     | Expression level |                |
|------|-------------|-----|--------|--------|--------|----------|------------|--------|--------|-------------|-----|-----|------------------|----------------|
|      | MN          | DRG | RG     | AC     | BC     |          | GC         | MF     | PC     | DG          | CA1 | CA2 |                  | CA3            |
| J045 | +           | +   | +      | +      | -      | +        | +          | +      | Subset | +           | +   | +   | +                | Dim*           |
| J023 | +           | +   | Subset | Subset | -      | L2/3; L5 | +          | +      | -      | +           | +   | +   | -                | Bright**       |
| J030 | +           | +   | +      | Subset | Subset | L5       | +          | Subset | -      | +           | +   | +   | -                | Very bright*** |

+: expression in most cells; subset: expression in < 80% of cells

AC: amacrine cells; BC: bipolar cells; CA: cornu ammonis; DG: dentate gyrus; DRG: dorsal root ganglion; GC: granule cells; L: cortical layer; MF: mossy fibers; MN: motor neurons; PC: Purkinje cells; RG: retinal ganglion cells

\* used in most experiments reported here

\*\*used in cortical *in vivo* imaging

\*\*\* not used as labeling pattern is filamentous rather than comet-like *in vivo*

### Supplementary Table 1 | Summary of expression patterns in three *Thy1:EB3-YFP* mouse lines.
